# Supplementary material for: Iron and nitrogen cycling, bacterioplankton community composition and mineral transformations involving phosphorus stabilisation in the ferruginous hypolimnion of a post-mining lake
Source: Royal Society of Chemistry journal article supplement (doi:10.1039/c8em00328a), 2018-01-01
Supplement: c8em00328a2.xlsx [file c8em00328a2.xlsx]

## Sheet: Sheet1
Depth	Temp (○C)	Conduct (mS/cm)	pH	ORP (mV)	Diss. O2 (%)	Lactic	Acetic	Formic	Butyric	Pyruvic	Oxalic	Citric	Cl-	NO3-	NH4+	SO42-	PO43-	Na	Mg	Si	P	S	K	Ca	V	Cr	Mn	Fe	Co	Ni	Zn	As	Hg	Na_p	Mg_p	Al_p	Si_p	P_p	S_p	K_p	Ca_p	V_p	Cr_p	Mn_p	Fe_p	Co_p	Ni_p	Zn_p	As_p
0	21.08	1086	7.59	268.7	8.92	85.43	667.102	474.706	831.9	250.792	163.924	1889.72	25892.2	6026.03	27.9	595879	225.302	83449.2	41460.6	2656.63	2.25073	149665	6244.41	96938.5	0.153355	0.273337	5.41564	4.00054	0.0435239	9.29346	5.0966	0.524014	0.700948	79.2353	11.0212	44.2432	71.2104	4.75176	27.4767	27.5011	37.0984	0.0320791	0.0437481	5.74331	48.9505	0.0290401	0.17898	21.819	0.028769
2	19.83	1074	8.03	291.2	9.27	30.592	605.19	408.27	819.586	246.448	158.152	1608.28	27615.3	6186.16	16.35	594996	243.242	84719.3	41450.4	2652.18	0.556937	155509	6222.21	98651.7	0.108122	0.193131	3.36401	2.15736	0.0317621	2.16089	BDL	0.470988	0.28592	48.5106	9.39224	22.5334	51.3226	2.41199	24.3212	17.1432	25.9184	0.0214469	0.0361118	2.41748	36.8479	0.0121738	0.294717	14.2139	0.0219546
4	19.46	1071	8.15	280.3	9.36	40.464	516.848	535.71	795.478	262.348	155.154	1314.21	27827	6409.77	16.6	578370	173.958	85701.4	42290.5	2615.76	1.48586	157873	6227.6	96556.2	0.0613372	0.212733	2.57108	4.13626	BDL	3.67941	BDL	0.381649	0.298385	36.2019	7.59252	15.0485	46.1895	2.4989	19.4207	12.7832	25.0357	0.0238289	0.108739	4.01372	49.4299	0.0542531	0.161189	12.3308	0.0270459
6	12.94	1103	8.03	283.9	11.09	61.028	634.134	828.2	786.322	217.432	137.394	1136.44	27709.2	6532.8	40.3	586671	114.826	86884.3	42721.5	3090.95	0.111133	158726	6329.02	102191	0.0434976	0.181117	3.66551	0	BDL	2.34311	BDL	0.525845	0.161222	93.7945	15.0895	48.1559	83.7084	5.11306	38.6003	31.9027	46.2729	0.0425499	0.0536877	6.39965	60.1395	0.0287674	0.277728	20.8623	0.0346367
8	11.59	1107	7.76	281.2	10.31	83.652	550.024	428.922	771.816	223.256	147.244	998.314	27764.9	6613.78	41	568281	89.798	88263.3	42889.1	3057.32	0.651941	161850	6335.31	100695	0.0518058	0.222995	3.9998	0	BDL	4.83051	BDL	0.498031	0.167554	40.0103	9.83335	17.84	30.3951	3.22672	29.4623	11.551	28.4878	0.0242678	0.0169753	4.66729	54.4694	0.0572609	0.260546	6.91861	0.0232805
10	10.08	1116	7.56	277.6	9.8	102.55	577.932	476.804	730.324	181.558	144.972	924.498	27535.1	6851.59	48.1	556845	64.814	90033.1	44001.3	3354.09	0	167937	7740.03	101208	0.115724	0.141453	4.17844	0.617411	BDL	3.97292	BDL	0.313686	0.191317	55.6685	8.61163	10.1099	27.3352	4.14957	28.3758	12.6403	33.3716	0.0175742	0.00870645	3.42579	37.2069	0.0426154	0.0977718	8.63717	0.0190353
12	7.6	1123	7.43	274	10.03	142.674	492.998	547.104	688.638	146.256	133.526	826.356	27785.3	6766.53	71.15	553252	52.932	93025.9	45081.8	3611.04	2.25978	171385	6555.19	103036	0.0233927	0.107214	10.6978	0.455108	BDL	6.74353	4.01244	0.287566	0.10471	119.529	11.6293	24.8851	70.1771	4.28554	33.432	29.7686	45.1294	0.0388064	0.0399807	9.27465	77.3987	0.126618	0.174001	20.7352	0.0583475
14	6.13	1134	7.34	273.1	10.21	103.5	542.18	441.332	638.84	74.798	141.85	741.182	27831.4	6781.9	59.6	549369	45.012	94016.8	45552	3785.52	1.47457	170667	6483.26	104200	0.0654476	0.135843	18.1468	2.34341	0.0355599	3.38306	0.590489	0.404607	0.151763	126.63	11.0604	32.1878	62.2824	4.09999	31.6845	31.9257	46.7711	0.0554599	0.0592022	9.36236	109.432	0.126975	0.258925	23.3398	0.102201
16	5.68	1140	7.35	270.1	10.31	67.622	388.438	335.866	662.846	141.316	138.656	702.964	27767.7	6844.39	50.3	541914	47.118	91848.7	44520.7	3756.37	1.18766	173631	6343.42	102115	0.0439982	0.204178	8.20434	2.03739	BDL	2.76405	0.209387	0.189061	0.0644247	79.955	13.1331	28.9395	53.0973	3.64288	37.6045	18.9055	40.5158	0.0570933	0.0595148	12.0257	86.1169	0.146795	0.220874	10.735	0.0748015
18	5.33	1147	7.34	267.4	10.36	64.336	386.778	361.526	616.038	122.458	123.038	607.05	27384.7	6815.33	53.6	538380	32.76	94152.8	44978.4	3678.14	0.803502	177804	6404.92	104354	0.070698	0.260672	8.89996	1.29223	BDL	2.17671	2.1464	0.340316	0.0587656	65.3163	11.4973	27.9177	30.3701	3.51232	34.5177	16.1453	36.7688	0.0613377	0.0549828	13.3812	85.1988	0.160623	0.190766	7.38029	0.0806891
20	4.96	1158	7.36	265.7	10.46	143.008	396.11	294.8	604.848	116.344	136.786	567.63	27627.5	6813.83	58.05	538331	36.392	94214.9	44636.2	3665.53	4.38466	164728	6356.28	104840	0.21073	0.421863	6.64878	BDL	0.187967	7.14582	4.62881	0.370926	0.409492	78.6922	13.0959	29.8692	37.725	3.34653	49.1494	17.1822	40.5691	0.0614825	0.05403	15.7868	76.7804	0.174033	0.2407	3.54116	0.0746599
22	4.65	1170	7.35	265.1	10.59	55.206	370.458	270.158	603.066	93.694	111.238	531.522	27664.9	6758.86	47	540767	32.464	94255.2	44912.9	3718.2	0.442995	166333	6443.57	104093	0.0713	0.294125	9.22713	1.40771	BDL	2.87906	1.71293	0.0925088	0.22724	56.8272	12.6025	33.9994	43.3625	3.21295	40.2183	12.9529	37.3407	0.0682259	0.0236181	13.6421	86.6276	0.164074	0.182013	1.45007	0.0892931
24	4.42	1184	7.33	264.8	10.55	92.24	407.41	614.162	BDL	BDL	111.25	475.77	27275.3	6765.12	45.1	548748	37.894	97676.3	44809.4	3791.51	0.888132	169000	6613.7	105907	0.077088	0.284415	10.2903	2.04871	BDL	3.65928	0.329361	0.50746	0.226334	68.26	12.8762	36.9932	35.1913	3.13275	43.0159	12.708	41.4534	0.0696295	0.041213	13.7139	88.1352	0.165748	0.228153	4.56448	0.083816
28	4.13	1228	7.2	265.1	10.09	53.202	400.214	424.756	BDL	BDL	105.822	398.026	26717.4	6697.42	36.35	562177	27.152	102123	46608.4	3826.67	0.399622	172839	6748.18	110312	0.0603364	0.252778	14.099	0.309857	BDL	3.38096	0.639145	0.344197	0.143925	122.138	16.182	46.4109	68.5585	3.13371	53.5074	21.2102	55.3057	0.0692308	0.0798973	11.2473	78.1998	0.142876	0.217893	7.94014	0.070437
30	4.01	1260	7.16	264.9	9.86	79.436	375.418	309.858	BDL	BDL	95.588	365.296	27087.5	6639.64	40.9	576503	31.744	103027	48413	3890.6	0.382295	177833	6791.55	110260	0.0720911	0.248535	24.5951	5.317	0.015448	4.1505	3.07399	0.377623	0.080273	36.3282	12.4794	37.8178	33.7968	3.14642	46.234	12.1862	36.7144	0.0654772	0.034317	11.048	81.4497	0.136581	0.152018	0.0411238	0.0680274
32	4	1308	7.07	263.7	9.26	50.752	437.696	316.56	BDL	BDL	108.44	360.37	26793.7	6420.28	31.7	596251	27.384	103783	48838.9	3722.41	0.0460249	178981	6773.14	110403	0.0598214	0.152922	47.1397	2.9058	0.0721622	3.12713	2.23944	0.125544	0.0970796	72.083	10.73	41.853	52.4311	3.05994	30.4576	14.212	35.057	0.0616922	0.0409114	11.1228	97.0793	0.148364	0.149966	11.2128	0.0627164
34	4.04	1353	7	264.1	8.74	BDL	437.946	346.226	BDL	BDL	86.472	323.336	26696.8	6308.48	35.35	616291	24.58	111107	50402.9	3905.84	0.0641263	196546	7125.38	114008	0.0535995	0.308481	67.0853	20.6547	0.176268	3.70732	1.42767	0.216282	0.0568734	77.466	12.3972	43.0128	59.0001	3.44766	47.0836	15.4457	38.1446	0.062412	0.0191849	16.9832	111.113	0.219277	0.135114	7.14953	0.0797287
36	4.1	1396	6.93	263.5	8.15	BDL	437	362.302	BDL	BDL	96.964	319.37	26440	6207.64	36.25	617308	20.994	105764	48839.9	3820.47	0.698955	192853	6901.94	111004	0.0375571	0.277894	79.7789	3.54107	0.250762	2.91903	4.89959	0.136224	0.107618	101.25	13.6688	38.2754	49.0043	3.33975	49.6004	18.9694	42.322	0.0533229	0.0388033	18.2103	127.604	0.255797	0.128758	11.7998	0.0682508
38	4.15	1419	6.91	262.4	7.83	BDL	384.594	103.286	BDL	BDL	77.95	296.766	25927.1	6065.96	47.65	629072	22.574	121689	53829.1	4178.03	BDL	207435	7444.68	122083	0.0275512	0.315435	101.832	8.22919	0.328857	4.26989	3.63049	0.181175	0.0789726	63.4711	11.5967	40.2179	43.8379	3.05327	36.5712	19.3852	41.8881	0.0498808	0.0947304	24.3671	133.808	0.329498	0.122819	5.08664	0.0696541
40	4.17	1425	6.89	261.5	7.71	BDL	215.31	164.254	BDL	BDL	84.008	305.236	26710.6	6192.51	34.55	643037	21.34	113014	49560.1	3911.79	BDL	179215	6999.18	114642	0.139112	0.356843	101.428	5.89734	0.290858	3.39176	1.09808	0.222791	0.516931	84.2354	11.2126	43.2033	52.4088	2.99669	30.7394	23.5526	40.2942	0.0462056	0.054512	19.0111	139.185	0.302298	0.121918	21.4988	0.0619995
42	4.26	1436	6.88	260.8	7.61	BDL	306.66	398.742	BDL	BDL	59.082	209.522	25972.6	6094.26	40.1	612946	21.104	109295	48922.2	3908.47	BDL	175919	7136.11	115597	0.0402908	0.303396	96.3089	4.17249	0.34931	4.6023	6.18852	0.298688	0.331715	86.9895	12.7029	45.8068	58.7385	3.33843	34.9035	21.7495	44.0885	0.0479693	0.0822874	19.2193	141.429	0.312591	0.135226	18.1562	0.0590597
44	6.94	4754	6.75	-58.2	0.02	BDL	216.92	1480.66	BDL	BDL	623.48	1213.17	18438.8	1857.55	1585	1.80173e+06	55.28	401051	128403	5455.08	BDL	381532	10496.7	259877	0.0481304	0.229206	3865.24	1009.75	40.2137	20.435	7.51857	0.299062	0.258244	1693.02	95.7028	435.129	810.993	6.70112	290.472	627.055	595.916	0.140057	1.29304	18.6095	2477.24	0.326037	0.703609	832.36	0.945497
46	8.22	5413	6.83	-113.7	0.02	BDL	3755.31	1733.76	BDL	BDL	606.15	1197.87	17831.3	2528.04	2800	1.93859e+06	108.61		140797	6302.3	BDL	411081	11442.9	278545	0.0826917	0.221108	3995.42	8039.67	30.6991	9.19349	8.08706	1.08156	0.117708	1539.03	105.809	372.148	842.598	11.0985	353.097	561.185	895.432	0.40836	1.54701	21.56	7321.38	0.341333	0.755614	726.904	6.22935
48	9.06	6031	6.78	-124.7	0.02	BDL	4846.42	1733.91	BDL	BDL	570.78	926.64	18260.4	3023.4	3315	2.04015e+06	128.67		133587	6269.76	BDL	404733	11815.3	270504	0.0364837	0.164299	3057.02	4935.26	23.4299	7.96371	7.74374	1.22114	0.117055	1359.66	107.751	445.363	910.732	20.7969	369.907	494.695	1034.57	0.780767	0.546678	23.2182	9642.58	0.447885	0.89445	627.707	12.3189
Notes:
Concentrations in ppb
_p: Particulate
